# Supplementary material for: Development of an ensemble-adjoint optimization approach to derive uncertainties in net carbon fluxes
Source: Copernicus journal article supplement (doi:10.5194/gmd-4-1011-2011), 2011-11-18
Supplement: Supplementary file [file gmd-4-1011-2011-supplement.pdf]

# 1 Supporting Information

## 2 Title

3 Development of an ensemble-adjoint optimization approach to derive uncertainties in  
4 net carbon fluxes

5

## 6 List of Authors

7 T. Ziehn<sup>1</sup>, M. Scholze<sup>1</sup>, W. Knorr<sup>1,2</sup>

8

## 9 Institute

10 <sup>1</sup>Department of Earth Sciences, University of Bristol, Wills Memorial Building, Queen's  
11 Road, Bristol, BS8 1RJ, UK

12 <sup>2</sup>Department of Meteorology and Climatology, Aristotle University of Thessaloniki,  
13 54124 Thessaloniki, Greece.

14

## 15 Corresponding author

16 T. Ziehn, Tel.: +44 117 331 4466, Fax: +44 117 925 3385, email: tilo.ziehn@bristol.ac.uk

17 **Figures and Tables**

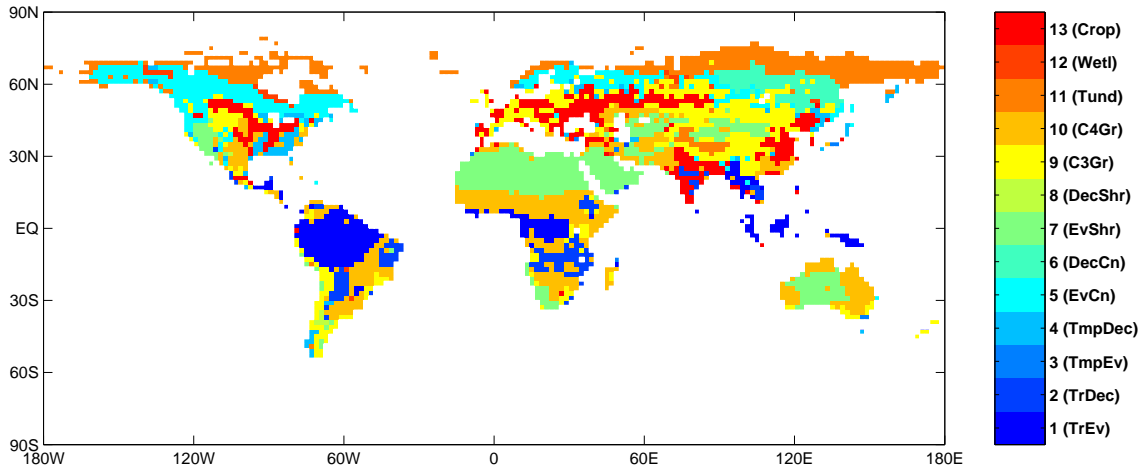

Figure S1: Distribution of the dominant PDF per grid cell. PFT labels are given in Table S3.

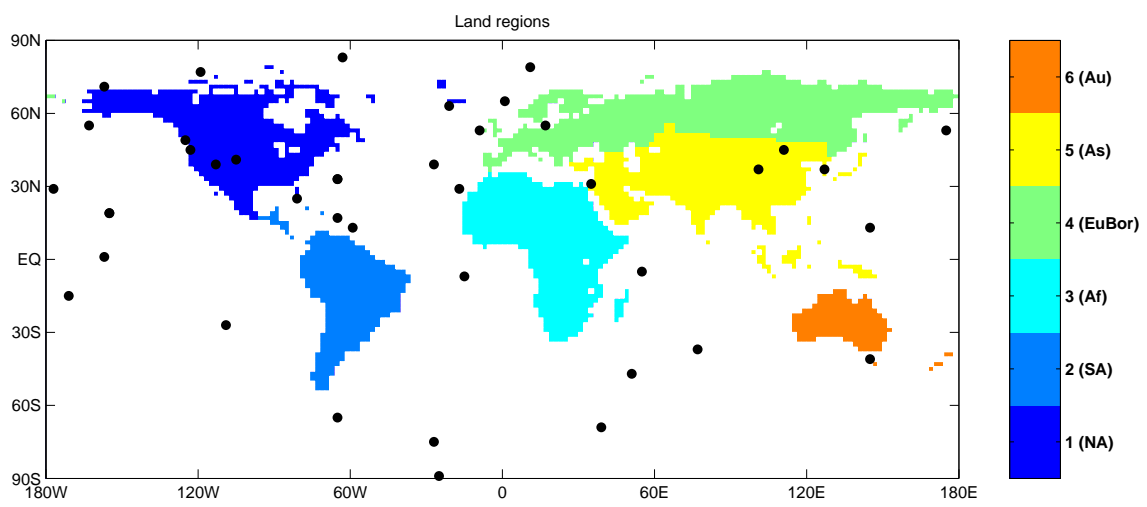

Figure S2: Land regions and the location of the 41 stations used in CCDAS. Labels are given in Table S4.

Table S1: Prior parameter values and uncertainties for the NPP related parameters. Units:  $V_{max}^{25}$ ,  $\mu\text{mol}(\text{CO}_2)\text{m}^{-2}\text{s}^{-1}$ ;  $a_{\Gamma,T}$ ,  $\mu\text{mol}(\text{CO}_2)\text{mol}(\text{air})^{-1}(\text{°C})^{-1}$ ; activation energies  $E$ , J/mol; all others unitless. Uncertainties are in percentage and represent one standard deviation.

| No. | Parameter              | Initial value        | Prior uncertainty |
|-----|------------------------|----------------------|-------------------|
| 1   | $V_{max}^{25}(TrEv)$   | 60.00                | 20                |
| 2   | $V_{max}^{25}(TrDec)$  | 90.00                | 20                |
| 3   | $V_{max}^{25}(TmpEv)$  | 41.00                | 20                |
| 4   | $V_{max}^{25}(TmpDec)$ | 35.00                | 20                |
| 5   | $V_{max}^{25}(EvCn)$   | 29.00                | 20                |
| 6   | $V_{max}^{25}(DecCn)$  | 53.00                | 20                |
| 7   | $V_{max}^{25}(EvShr)$  | 52.00                | 20                |
| 8   | $V_{max}^{25}(DecShr)$ | 160.00               | 20                |
| 9   | $V_{max}^{25}(C3Gr)$   | 42.00                | 20                |
| 10  | $V_{max}^{25}(C4Gr)$   | 8.00                 | 20                |
| 11  | $V_{max}^{25}(Tund)$   | 20.00                | 20                |
| 12  | $V_{max}^{25}(Wetl)$   | 20.00                | 20                |
| 13  | $V_{max}^{25}(Crop)$   | 117.00               | 20                |
| 14  | $a_{J,V}(TrEv)$        | 1.96                 | 5                 |
| 15  | $a_{J,V}(TrDec)$       | 1.99                 | 5                 |
| 16  | $a_{J,V}(TmpEv)$       | 2.00                 | 5                 |
| 17  | $a_{J,V}(TmpDec)$      | 2.00                 | 5                 |
| 18  | $a_{J,V}(EvCn)$        | 1.79                 | 5                 |
| 19  | $a_{J,V}(DecCn)$       | 1.79                 | 5                 |
| 20  | $a_{J,V}(EvShr)$       | 1.96                 | 5                 |
| 21  | $a_{J,V}(DecShr)$      | 1.66                 | 5                 |
| 22  | $a_{J,V}(C3Gr)$        | 1.90                 | 5                 |
| 23  | $a_{J,V}(C4Gr)$        | 14.00                | 5                 |
| 24  | $a_{J,V}(Tund)$        | 1.85                 | 5                 |
| 25  | $a_{J,V}(Wetl)$        | 1.85                 | 5                 |
| 26  | $a_{J,V}(Crop)$        | 1.88                 | 5                 |
| 27  | $\alpha_q$             | 0.28                 | 5                 |
| 28  | $\alpha_i$             | 0.04                 | 5                 |
| 29  | $K_C^{25}$             | $460 \times 10^{-6}$ | 5                 |
| 30  | $K_O^{25}$             | 0.33                 | 5                 |
| 31  | $a_{\Gamma,T}$         | 1.70                 | 5                 |
| 32  | $E_{K_O}$              | 35948                | 5                 |
| 33  | $E_{K_C}$              | 59356                | 5                 |
| 34  | $E_{V_{max}}$          | 58520                | 5                 |
| 35  | $E_k$                  | 50967                | 5                 |
| 36  | $E_{R_d}$              | 45000                | 5                 |
| 37  | $f_{R.leaf}$           | 0.40                 | 25                |
| 38  | $f_{R.growth}$         | 1.25                 | 5                 |

Table S2: Prior and posterior parameter values including their uncertainties for the carbon balance parameter  $\beta$  and the offset. Upper and lower percentiles equivalent to one standard deviation are given. The first index for the  $\beta$  parameters refers to the PFT (labels see Table S3 ) and the second one to the region (labels see Table S4). Units: offset, ppmv;  $\beta$ , unitless.

| No. | Parameter      | Prior  |                |                | Posterior |                |                |              |                |                |
|-----|----------------|--------|----------------|----------------|-----------|----------------|----------------|--------------|----------------|----------------|
|     |                | $\mu$  | $\mu - \sigma$ | $\mu + \sigma$ | Base Case |                |                | Superimposed |                |                |
|     |                |        |                |                | $\mu$     | $\mu - \sigma$ | $\mu + \sigma$ | $\mu$        | $\mu - \sigma$ | $\mu + \sigma$ |
| 1   | $\beta_{1,1}$  | 1.00   | 0.75           | 1.25           | 0.65      | 0.47           | 0.87           | 0.66         | 0.47           | 0.88           |
| 2   | $\beta_{2,1}$  | 1.00   | 0.75           | 1.25           | 0.42      | 0.31           | 0.56           | 0.43         | 0.30           | 0.65           |
| 3   | $\beta_{3,1}$  | 1.00   | 0.75           | 1.25           | 0.82      | 0.60           | 1.07           | 0.82         | 0.60           | 1.07           |
| 4   | $\beta_{4,1}$  | 1.00   | 0.75           | 1.25           | 0.25      | 0.20           | 0.32           | 0.25         | 0.19           | 0.33           |
| 5   | $\beta_{5,1}$  | 1.00   | 0.75           | 1.25           | 1.56      | 1.52           | 1.60           | 1.57         | 1.49           | 1.66           |
| 6   | $\beta_{7,1}$  | 1.00   | 0.75           | 1.25           | 1.04      | 0.86           | 1.22           | 1.01         | 0.71           | 1.26           |
| 7   | $\beta_{8,1}$  | 1.00   | 0.75           | 1.25           | 0.75      | 0.55           | 0.99           | 0.77         | 0.54           | 1.07           |
| 8   | $\beta_{9,1}$  | 1.00   | 0.75           | 1.25           | 0.61      | 0.49           | 0.74           | 0.62         | 0.46           | 0.79           |
| 9   | $\beta_{10,1}$ | 1.00   | 0.75           | 1.25           | 1.29      | 1.21           | 1.36           | 1.24         | 1.08           | 1.37           |
| 10  | $\beta_{11,1}$ | 1.00   | 0.75           | 1.25           | 1.28      | 1.16           | 1.40           | 1.26         | 1.07           | 1.42           |
| 11  | $\beta_{12,1}$ | 1.00   | 0.75           | 1.25           | 1.38      | 1.18           | 1.55           | 1.37         | 1.14           | 1.56           |
| 12  | $\beta_{13,1}$ | 1.00   | 0.75           | 1.25           | 0.22      | 0.17           | 0.28           | 0.21         | 0.16           | 0.29           |
| 13  | $\beta_{1,2}$  | 1.00   | 0.75           | 1.25           | 0.74      | 0.72           | 0.76           | 0.74         | 0.68           | 0.78           |
| 14  | $\beta_{2,2}$  | 1.00   | 0.75           | 1.25           | 1.86      | 1.82           | 1.89           | 1.85         | 1.80           | 1.89           |
| 15  | $\beta_{4,2}$  | 1.00   | 0.75           | 1.25           | 1.73      | 1.65           | 1.80           | 1.73         | 1.63           | 1.80           |
| 16  | $\beta_{5,2}$  | 1.00   | 0.75           | 1.25           | 1.62      | 1.49           | 1.72           | 1.61         | 1.47           | 1.72           |
| 17  | $\beta_{7,2}$  | 1.00   | 0.75           | 1.25           | 1.73      | 1.64           | 1.80           | 1.73         | 1.63           | 1.80           |
| 18  | $\beta_{8,2}$  | 1.00   | 0.75           | 1.25           | 1.86      | 1.81           | 1.89           | 1.85         | 1.79           | 1.89           |
| 19  | $\beta_{9,2}$  | 1.00   | 0.75           | 1.25           | 1.93      | 1.92           | 1.95           | 1.93         | 1.91           | 1.95           |
| 20  | $\beta_{10,2}$ | 1.00   | 0.75           | 1.25           | 0.80      | 0.76           | 0.85           | 0.84         | 0.66           | 1.04           |
| 21  | $\beta_{11,2}$ | 1.00   | 0.75           | 1.25           | 1.06      | 0.81           | 1.30           | 1.05         | 0.80           | 1.30           |
| 22  | $\beta_{12,2}$ | 1.00   | 0.75           | 1.25           | 1.33      | 1.11           | 1.52           | 1.33         | 1.11           | 1.52           |
| 23  | $\beta_{13,2}$ | 1.00   | 0.75           | 1.25           | 1.59      | 1.46           | 1.70           | 1.58         | 1.43           | 1.70           |
| 24  | $\beta_{1,3}$  | 1.00   | 0.75           | 1.25           | 1.23      | 1.14           | 1.31           | 1.19         | 0.93           | 1.40           |
| 25  | $\beta_{2,3}$  | 1.00   | 0.75           | 1.25           | 0.13      | 0.10           | 0.16           | 0.13         | 0.10           | 0.17           |
| 26  | $\beta_{3,3}$  | 1.00   | 0.75           | 1.25           | 0.84      | 0.62           | 1.08           | 0.86         | 0.62           | 1.12           |
| 27  | $\beta_{4,3}$  | 1.00   | 0.75           | 1.25           | 0.94      | 0.70           | 1.19           | 0.94         | 0.70           | 1.20           |
| 28  | $\beta_{7,3}$  | 1.00   | 0.75           | 1.25           | 0.44      | 0.33           | 0.58           | 0.45         | 0.32           | 0.69           |
| 29  | $\beta_{8,3}$  | 1.00   | 0.75           | 1.25           | 1.51      | 1.35           | 1.65           | 1.49         | 1.08           | 1.66           |
| 30  | $\beta_{9,3}$  | 1.00   | 0.75           | 1.25           | 1.35      | 1.24           | 1.46           | 1.34         | 1.15           | 1.49           |
| 31  | $\beta_{10,3}$ | 1.00   | 0.75           | 1.25           | 1.07      | 1.03           | 1.11           | 1.06         | 0.98           | 1.14           |
| 32  | $\beta_{12,3}$ | 1.00   | 0.75           | 1.25           | 1.18      | 0.94           | 1.41           | 1.18         | 0.93           | 1.41           |
| 33  | $\beta_{13,3}$ | 1.00   | 0.75           | 1.25           | 1.34      | 1.13           | 1.52           | 1.31         | 1.04           | 1.52           |
| 34  | $\beta_{3,4}$  | 1.00   | 0.75           | 1.25           | 1.04      | 0.79           | 1.29           | 1.04         | 0.79           | 1.29           |
| 35  | $\beta_{4,4}$  | 1.00   | 0.75           | 1.25           | 0.96      | 0.73           | 1.18           | 0.98         | 0.68           | 1.28           |
| 36  | $\beta_{5,4}$  | 1.00   | 0.75           | 1.25           | 0.79      | 0.68           | 0.91           | 0.80         | 0.65           | 0.96           |
| 37  | $\beta_{6,4}$  | 1.00   | 0.75           | 1.25           | 1.52      | 1.40           | 1.62           | 1.54         | 1.30           | 1.72           |
| 38  | $\beta_{7,4}$  | 1.00   | 0.75           | 1.25           | 0.55      | 0.40           | 0.73           | 0.56         | 0.39           | 0.78           |
| 39  | $\beta_{8,4}$  | 1.00   | 0.75           | 1.25           | 0.38      | 0.28           | 0.51           | 0.40         | 0.28           | 0.56           |
| 40  | $\beta_{9,4}$  | 1.00   | 0.75           | 1.25           | 1.62      | 1.55           | 1.69           | 1.60         | 1.45           | 1.73           |
| 41  | $\beta_{10,4}$ | 1.00   | 0.75           | 1.25           | 0.25      | 0.19           | 0.33           | 0.25         | 0.18           | 0.34           |
| 42  | $\beta_{11,4}$ | 1.00   | 0.75           | 1.25           | 0.58      | 0.49           | 0.68           | 0.61         | 0.38           | 0.88           |
| 43  | $\beta_{12,4}$ | 1.00   | 0.75           | 1.25           | 0.81      | 0.59           | 1.05           | 0.81         | 0.57           | 1.07           |
| 44  | $\beta_{13,4}$ | 1.00   | 0.75           | 1.25           | 0.31      | 0.24           | 0.40           | 0.31         | 0.21           | 0.46           |
| 45  | $\beta_{1,5}$  | 1.00   | 0.75           | 1.25           | 0.25      | 0.20           | 0.31           | 0.26         | 0.19           | 0.34           |
| 46  | $\beta_{2,5}$  | 1.00   | 0.75           | 1.25           | 1.85      | 1.80           | 1.88           | 1.84         | 1.76           | 1.88           |
| 47  | $\beta_{3,5}$  | 1.00   | 0.75           | 1.25           | 0.52      | 0.38           | 0.69           | 0.53         | 0.38           | 0.73           |
| 48  | $\beta_{4,5}$  | 1.00   | 0.75           | 1.25           | 0.27      | 0.21           | 0.36           | 0.28         | 0.21           | 0.38           |
| 49  | $\beta_{5,5}$  | 1.00   | 0.75           | 1.25           | 0.33      | 0.24           | 0.43           | 0.33         | 0.24           | 0.46           |
| 50  | $\beta_{7,5}$  | 1.00   | 0.75           | 1.25           | 0.31      | 0.24           | 0.40           | 0.32         | 0.20           | 0.51           |
| 51  | $\beta_{8,5}$  | 1.00   | 0.75           | 1.25           | 1.46      | 1.29           | 1.61           | 1.43         | 1.19           | 1.60           |
| 52  | $\beta_{9,5}$  | 1.00   | 0.75           | 1.25           | 0.63      | 0.57           | 0.70           | 0.63         | 0.48           | 0.77           |
| 53  | $\beta_{10,5}$ | 1.00   | 0.75           | 1.25           | 0.29      | 0.24           | 0.36           | 0.28         | 0.20           | 0.40           |
| 54  | $\beta_{11,5}$ | 1.00   | 0.75           | 1.25           | 0.93      | 0.69           | 1.18           | 0.92         | 0.68           | 1.17           |
| 55  | $\beta_{12,5}$ | 1.00   | 0.75           | 1.25           | 1.04      | 0.79           | 1.29           | 1.04         | 0.79           | 1.29           |
| 56  | $\beta_{13,5}$ | 1.00   | 0.75           | 1.25           | 1.86      | 1.81           | 1.89           | 1.85         | 1.71           | 1.89           |
| 57  | $\beta_{1,6}$  | 1.00   | 0.75           | 1.25           | 0.88      | 0.64           | 1.13           | 0.88         | 0.64           | 1.13           |
| 58  | $\beta_{2,6}$  | 1.00   | 0.75           | 1.25           | 0.99      | 0.75           | 1.24           | 1.00         | 0.75           | 1.25           |
| 59  | $\beta_{3,6}$  | 1.00   | 0.75           | 1.25           | 0.47      | 0.35           | 0.61           | 0.47         | 0.34           | 0.63           |
| 60  | $\beta_{4,6}$  | 1.00   | 0.75           | 1.25           | 1.40      | 1.20           | 1.56           | 1.39         | 1.18           | 1.56           |
| 61  | $\beta_{5,6}$  | 1.00   | 0.75           | 1.25           | 1.27      | 1.04           | 1.47           | 1.27         | 1.03           | 1.47           |
| 62  | $\beta_{7,6}$  | 1.00   | 0.75           | 1.25           | 0.23      | 0.18           | 0.30           | 0.23         | 0.16           | 0.34           |
| 63  | $\beta_{8,6}$  | 1.00   | 0.75           | 1.25           | 0.78      | 0.56           | 1.02           | 0.79         | 0.56           | 1.05           |
| 64  | $\beta_{9,6}$  | 1.00   | 0.75           | 1.25           | 0.38      | 0.31           | 0.47           | 0.39         | 0.28           | 0.53           |
| 65  | $\beta_{10,6}$ | 1.00   | 0.75           | 1.25           | 1.54      | 1.48           | 1.59           | 1.51         | 1.37           | 1.61           |
| 66  | $\beta_{11,6}$ | 1.00   | 0.75           | 1.25           | 1.03      | 0.78           | 1.28           | 1.03         | 0.78           | 1.28           |
| 67  | $\beta_{13,6}$ | 1.00   | 0.75           | 1.25           | 0.61      | 0.44           | 0.80           | 0.61         | 0.44           | 0.83           |
| 68  | offset         | 338.00 | 337.00         | 339.00         | 336.53    | 336.48         | 336.58         | 336.51       | 336.42         | 336.59         |

Table S3: PFTs as used in CarbonBETHY.

| PFT |                                               |
|-----|-----------------------------------------------|
| 1   | Tropical broadleaved evergreen tree (TrEv)    |
| 2   | Tropical broadleaved deciduous tree (TrDec)   |
| 3   | Temperate broadleaved evergreen tree (TmpEv)  |
| 4   | Temperate broadleaved deciduous tree (TmpDec) |
| 5   | Evergreen coniferous tree (EvCn)              |
| 6   | Deciduous coniferous tree (DecCn)             |
| 7   | Evergreen shrub (EvShr)                       |
| 8   | Deciduous shrub (DecShr)                      |
| 9   | C3 grass (C3Gr)                               |
| 10  | C4 grass (C4Gr)                               |
| 11  | Tundra vegetation (Tund)                      |
| 12  | Swamp vegetation (Wetl)                       |
| 13  | Crops (Crop)                                  |

Table S4: Regions as used in CarbonBETHY.

| Region |                            |
|--------|----------------------------|
| 1      | North America (NA)         |
| 2      | South America (SA)         |
| 3      | Africa (Af)                |
| 4      | Boreal Europe/Asia (EuBor) |
| 5      | Asia (As)                  |
| 6      | Australia (Au)             |
